# Supplementary material
Source: PubMed Central journal article supplement (PMC9050948)
Supplement: NIHMS1788219-supplement-Supplemental_Publication_Material.pdf [file NIHMS1788219-supplement-Supplemental_Publication_Material.pdf]

## **SUPPLEMENTAL MATERIALS**

### **Adipocyte-derived serum amyloid A promotes angiotensin II-induced abdominal aortic aneurysms in obese C57BL/6J mice**

Preetha Shridas, Ailing Ji, Andrea C Trumbauer, Victoria P Noffsinger, Steve W Leung,  
Adam J. Dugan, Sean E Thatcher, Lisa A Cassis, Frederick C De Beer, Nancy R Webb,  
Lisa R Tannock

#### **Affiliations**

The Departments of Internal Medicine (PS,AJ,VPN,SWL,FCDB, LRT), Pharmacology  
and Nutritional Sciences (LAC, NRW), Biostatistics (AJD), Saha Cardiovascular  
Research Center (PS,ACT, SWL,FCDB, NRW, LRT), Barnstable Brown Diabetes  
Center (PS, FCDB, NRW, LRT) University of Kentucky, Lexington, Kentucky 40536,  
Department of Veterans Affairs (LRT), Lexington, KY and the Department of  
Pharmacology, Temple University, Philadelphia, PA (SET).

**Figure S1**

**A**

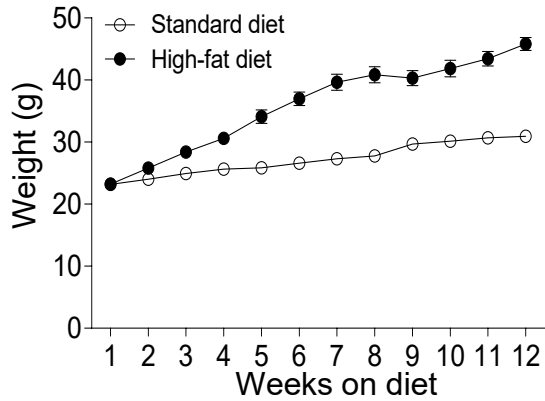

**B**

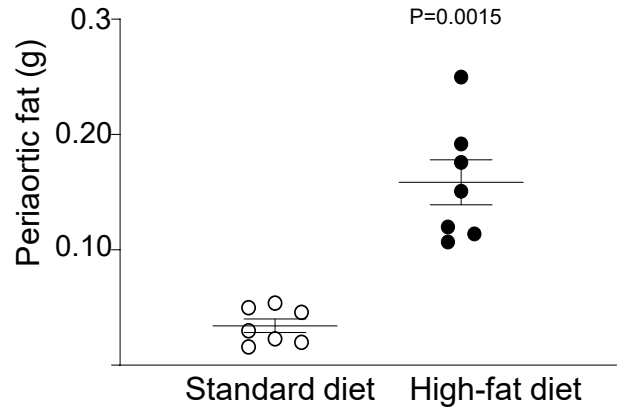

Figure S1. (A) Body weight changes in mice fed a standard diet or high-fat diet for 12 weeks. (B) Periaortic fat weight (mean  $\pm$  SEM) in mice fed standard versus HF diet for 12 weeks (n=7).

**Figure S2**

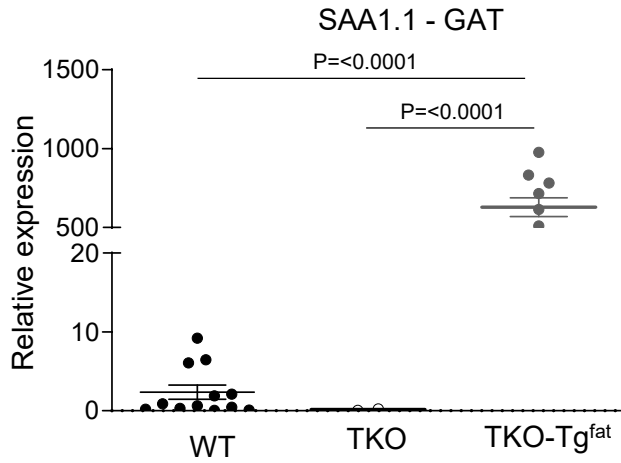

Figure S2. SAA1.1 mRNA expression in gonadal adipose tissues from AngII-infused obese WT, TKO and TKO-Tg<sup>fat</sup> mice. Data are mean ± SEM.

Figure S3

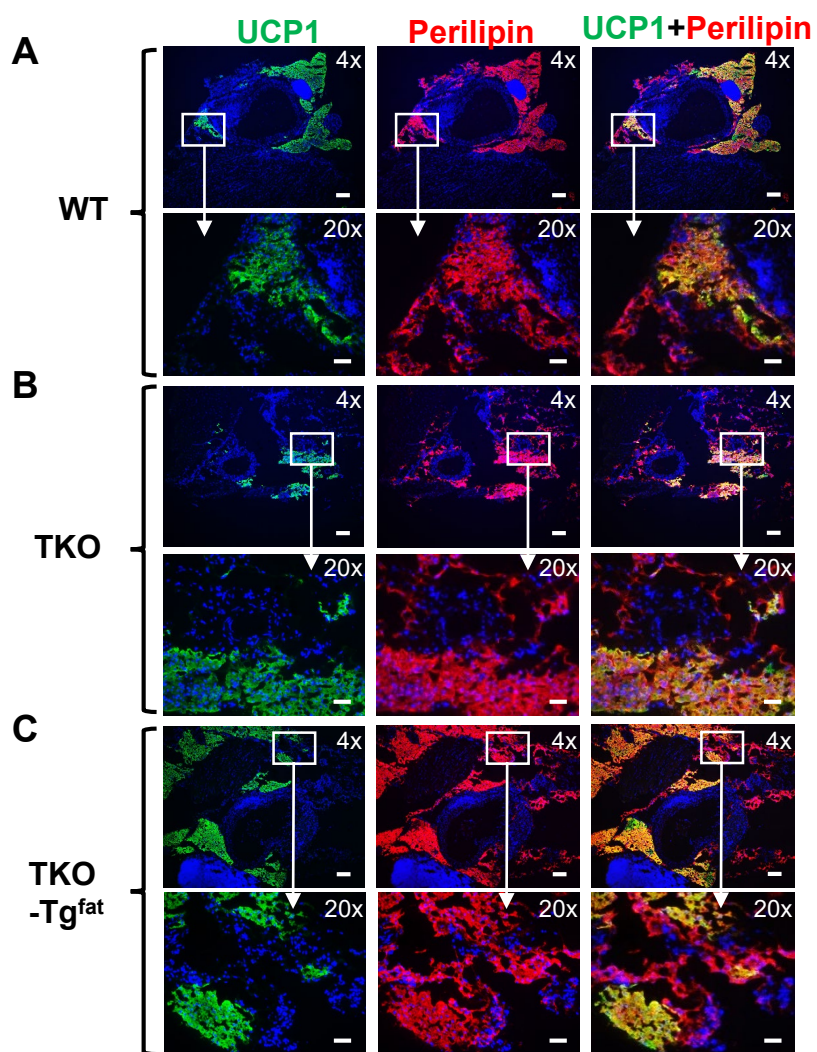

**D**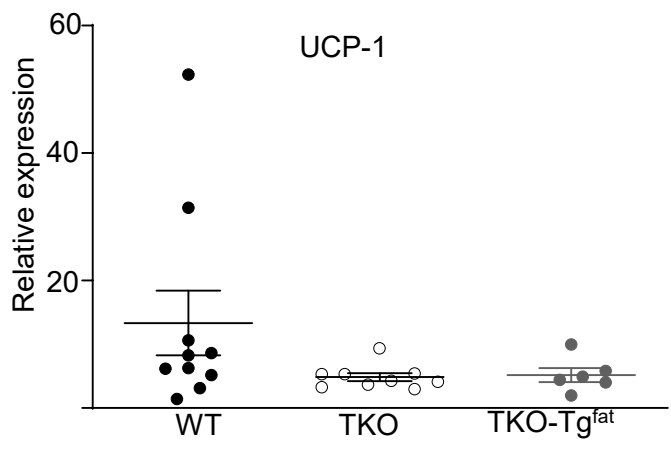**E**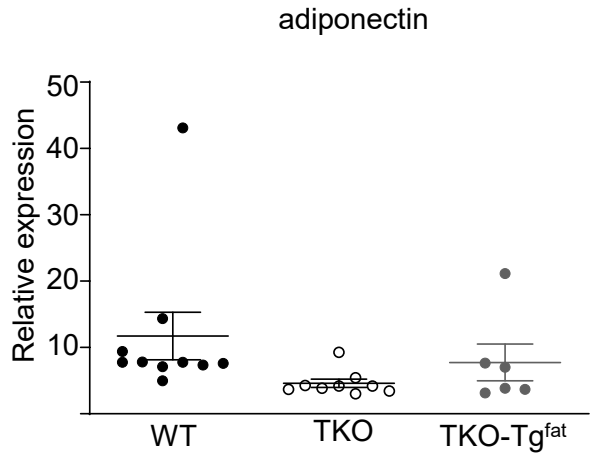**F**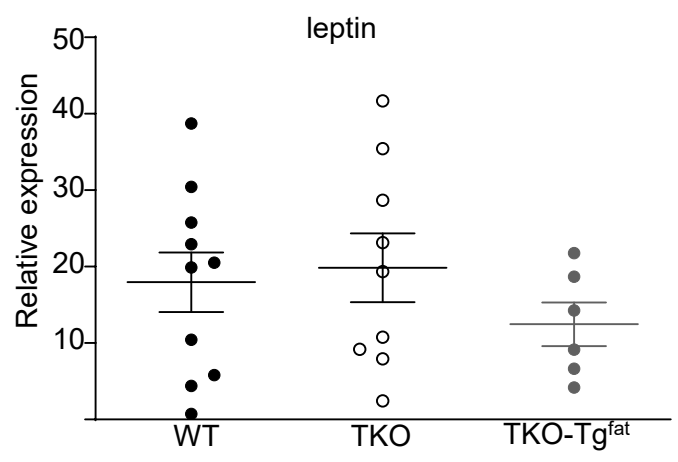**G**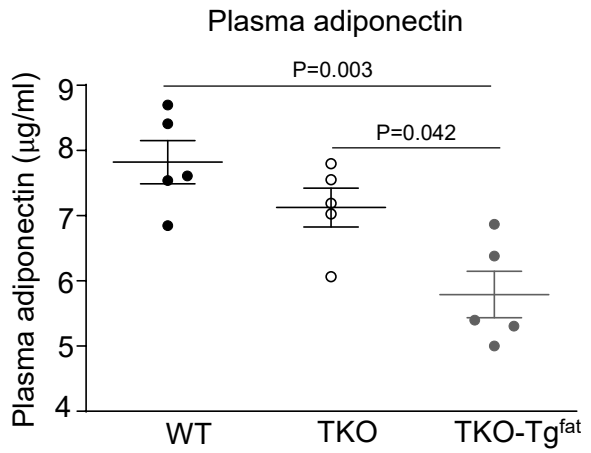**H**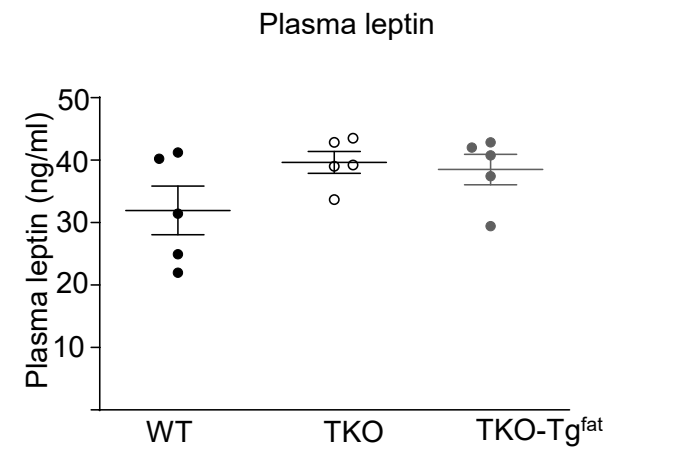

Figure S3. The expression of SAA in adipocytes has no effect on the presence of UCP1 positive cells. Sections showing the surrounding perivascular fat (PVAT) from WT (A), TKO (B) and TKO-Tg<sup>fat</sup> (C) mice were processed as described in Methods to detect UCP1 (green fluorescence) and perilipin (red fluorescence), as indicated. Nuclei were identified using DAPI (blue fluorescence). Images photographed under 4× and 20× objective magnification are shown; scale bar in 4x image is 200 μm, scale bar in 20x image is 50 μm. Expression of UCP-1 (D), adiponectin (E), leptin (F) mRNA in PVAT of WT, TKO and TKO-Tg<sup>fat</sup>. Plasma adiponectin (G) and leptin (H) levels in WT, TKO and TKO-Tg<sup>fat</sup>.

Figure S4

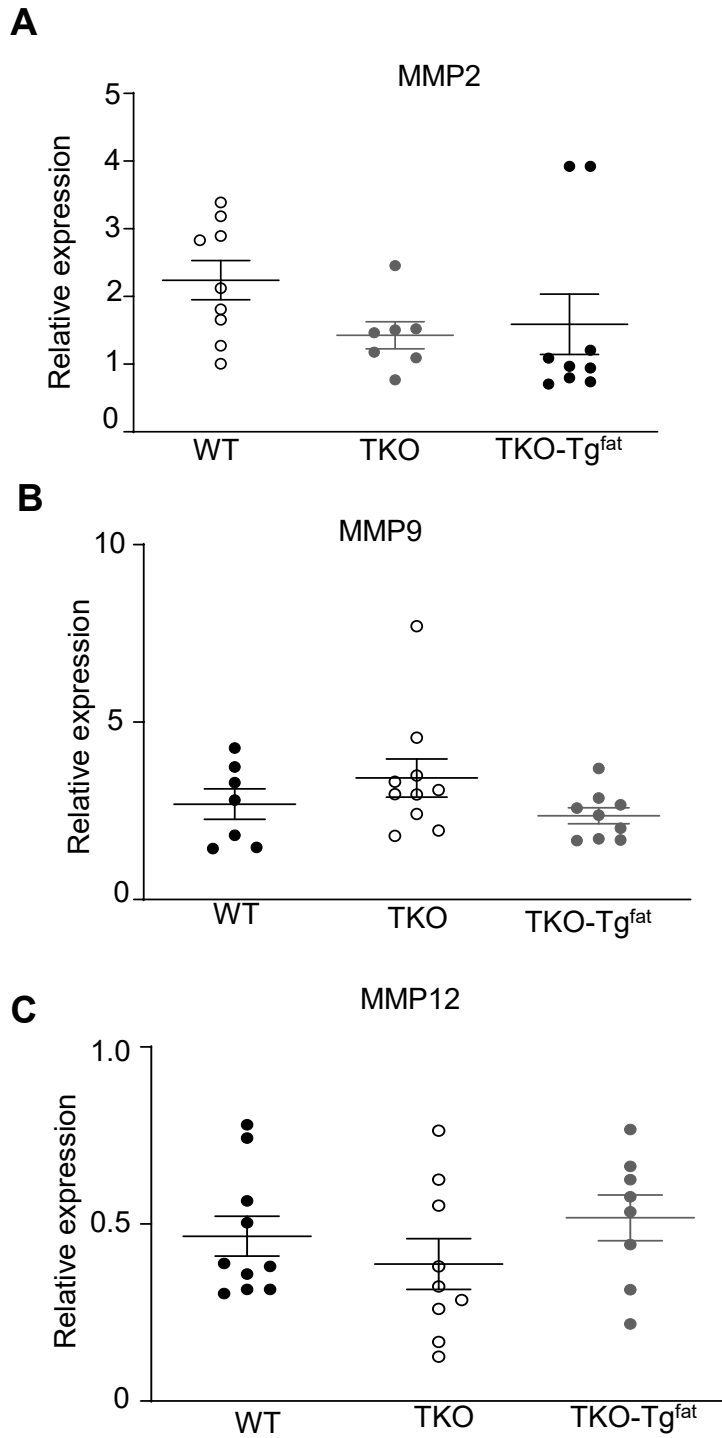

Figure S4. Expression of MMP2 (A), MMP9 (B), MMP12 (C) mRNA in periaortic adipose tissues of WT, TKO and TKO-Tg<sup>fat</sup>.

**Figure S5**

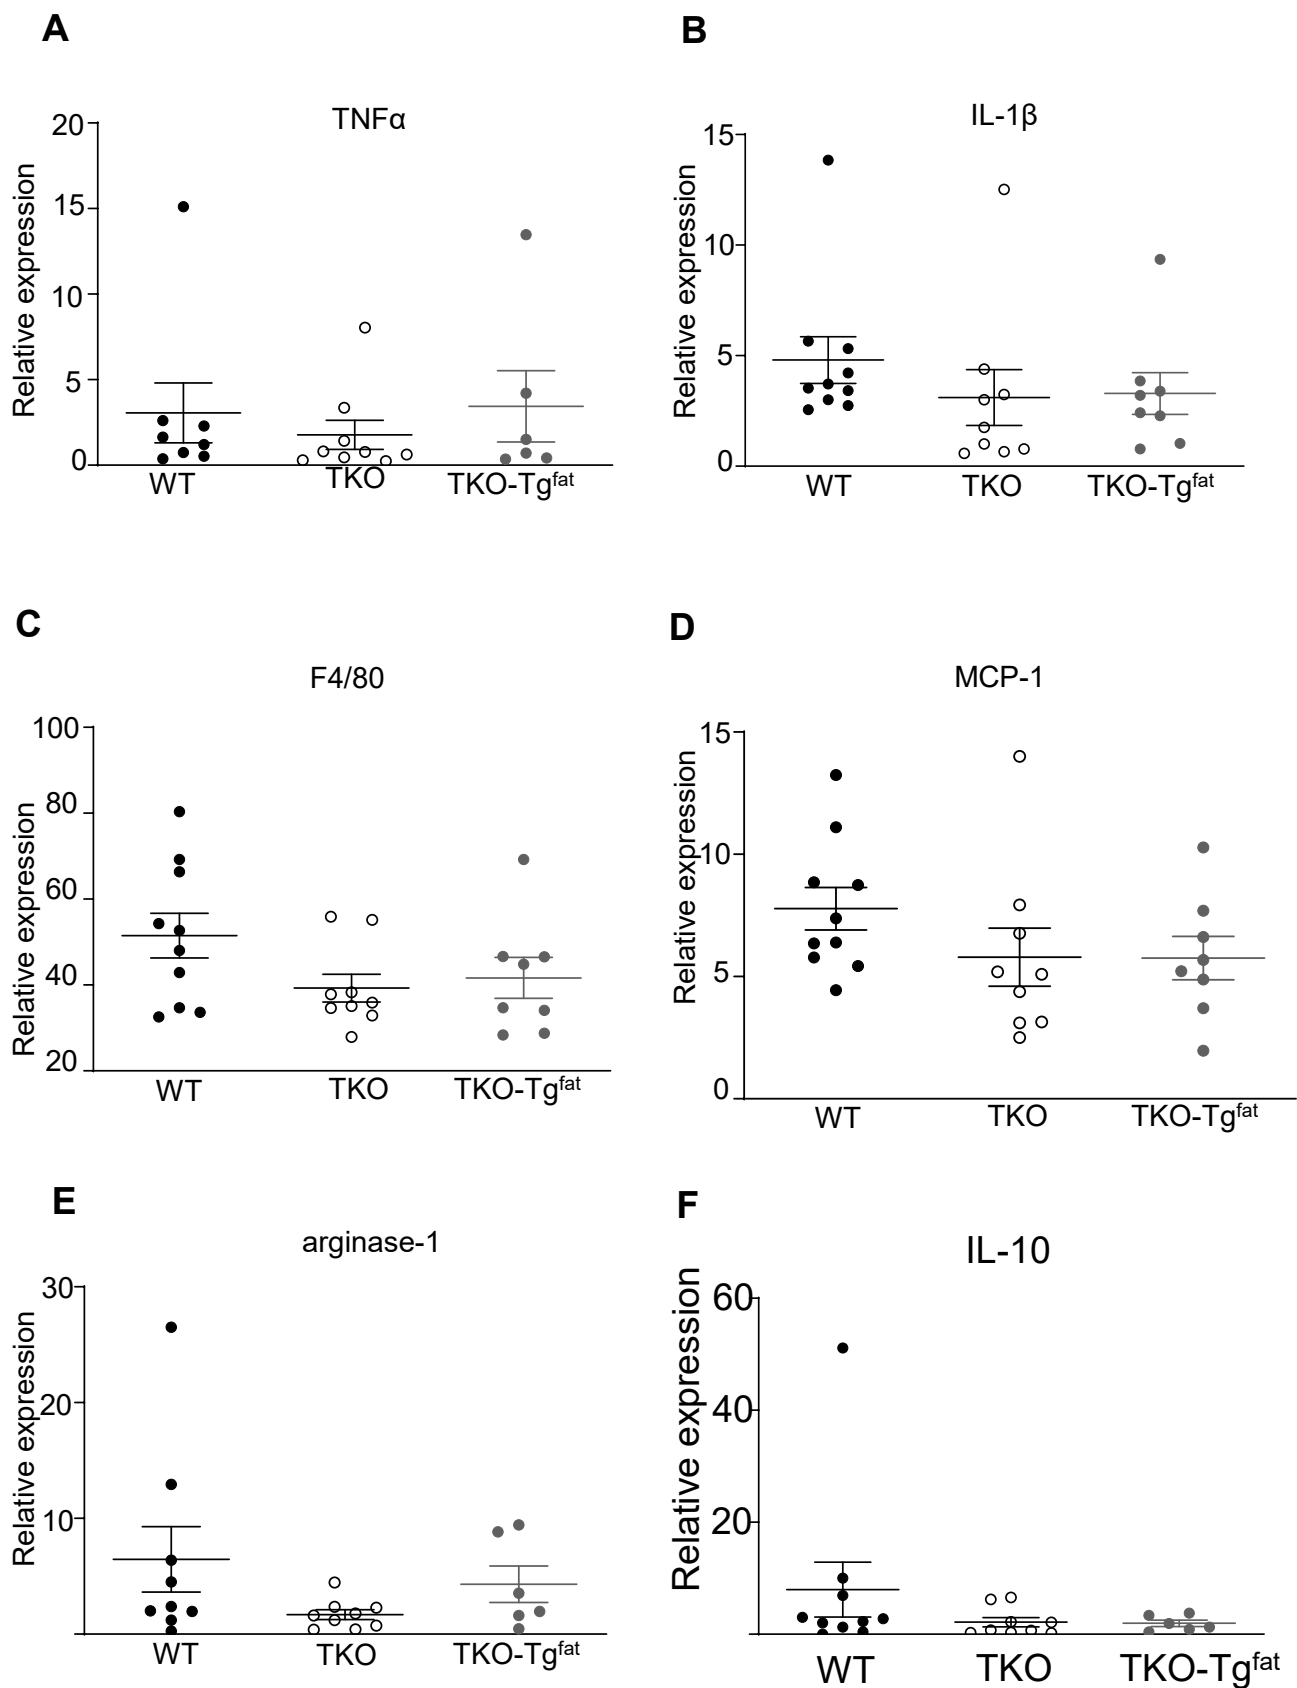



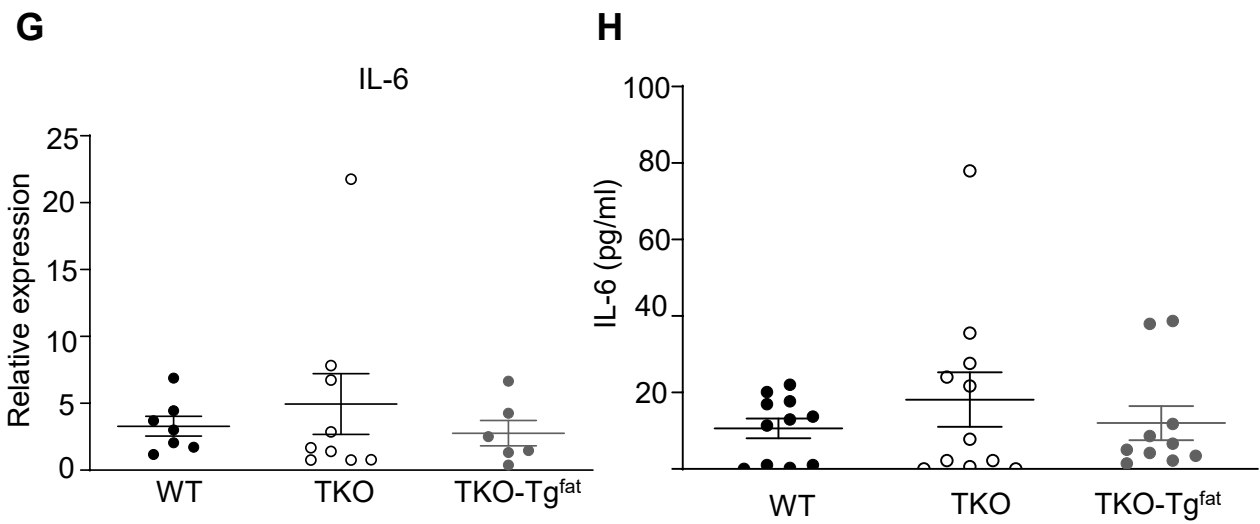

Figure S5. Expression of TNF $\alpha$  (A), IL-1 $\beta$  (B), F4/80 (C), MCP-1 (D), arginase-1 (E), IL-10 (F) and IL-6 (G) mRNAs in periaortic adipose tissues of WT, TKO and TKO-Tg<sup>fat</sup>. Plasma IL-6 levels in WT, TKO and TKO-Tg<sup>fat</sup> (H).

## Major Resources Table

### Animals (in vivo studies)

| Species                                                                                                                                  | Vendor or Source                                                    | Background Strain | Sex | Persistent ID / URL |
|------------------------------------------------------------------------------------------------------------------------------------------|---------------------------------------------------------------------|-------------------|-----|---------------------|
| C57Bl/6J                                                                                                                                 | Generated in-house                                                  | C57Bl/6J          | M   |                     |
| TKO (Serum amyloid A 1.1,2.1 and 3 deficient)                                                                                            | Drs. June-Yong Lee and Dan Littman, New York University             | C57Bl/6J          | M   |                     |
| Transgenic, expressing Serum amyloid A 1.1 regulated by a tetracycline-responsive promoter                                               | Dr. Paul Simon, University College London, UK                       | C57Bl/6J          | M   |                     |
| Transgenic expressing reverse tetracycline-controlled transactivator (rtTA) under control of the adipocyte-specific adiponectin promoter | Dr. Philip Scherer, University of Texas Southwestern Medical Center | C57Bl/6J          | M   |                     |
| TKO-Tg <sup>Fat</sup> with inducible serum amyloid A expression only in adipose tissues                                                  | Generated in-house                                                  | C57Bl/6J          | M   |                     |

### Antibodies

| Target antigen                               | Vendor or Source        | Catalog # | Working concentration          | Lot # (preferred but not required) | Application |
|----------------------------------------------|-------------------------|-----------|--------------------------------|------------------------------------|-------------|
| Mouse SAA                                    | De Beer laboratory      | -         | 1:500 dilution of the stock    |                                    | IHC         |
| Mouse SAA                                    | Abcam                   | Ab199030  | 1.1 µg/ml                      |                                    | IHC         |
| Mouse CD36                                   | Abcam                   | Ab53444   | 5.0 µg/ml                      |                                    | IHC         |
| Alexa-fluor 568-labeled goat anti-rabbit IgG | ThermoFisher Scientific | A-11011   | 10.0 µg/ml                     |                                    | IFC         |
| Alexa-fluor 488-labeled goat anti-rat IgG    | ThermoFisher Scientific | A-11006   | 10.0 µg/ml                     |                                    | IFC         |
| Mouse SAA                                    | Abcam                   | Ab199030  | 0.22 µg/ml                     |                                    | WB          |
| Anti-rabbit antibody                         | Abcam                   | Ab205718  | 0.2 µg/ml                      |                                    | WB          |
| Anti-β-actin                                 | Sigma                   | A5441     | ~ 1µg/ml                       |                                    | WB          |
| Anti-mouse antibody                          | Sigma                   | A4416     | 1:10,000 dilution of the stock |                                    | WB          |
